# Supplementary material for: Tibial revision knee arthroplasty with metaphyseal sleeves: The effect of stems on implant fixation and bone flexibility
Source: PubMed Central journal article supplement (PMC5421801; doi:10.1371/journal.pone.0177285), 2017-05-08
Supplement: pone.0177285.s001.pdf [file pone.0177285.s001.pdf]

**IMPLANT STABILITY**

| Group | Relative micromotions in $\mu\text{m}$ |    |    |    |    |    |    |    |    |                     |    |    |    |    |    |    |    |    |    |
|-------|----------------------------------------|----|----|----|----|----|----|----|----|---------------------|----|----|----|----|----|----|----|----|----|
|       | rotational torque                      |    |    |    |    |    |    |    |    | Varus-valgus torque |    |    |    |    |    |    |    |    |    |
|       | #1                                     | #2 | #3 | #4 | #5 | #6 | #7 | #8 | #9 | #1                  | #2 | #3 | #4 | #5 | #6 | #7 | #8 | #9 |    |
| A     | n°1                                    | 7  | 5  | 3  | 3  | 6  | 7  | 16 | 25 |                     | 14 | 12 | 5  | 4  | 2  | 2  | 9  | 18 |    |
|       | n°2                                    | 7  | 5  | 3  | 3  | 6  | 9  | 17 | 23 |                     | 14 | 12 | 5  | 4  | 2  | 1  | 7  | 16 |    |
|       | n°3                                    | 5  | 3  | 3  | 3  | 5  | 6  | 14 | 23 |                     | 15 | 12 | 5  | 4  | 2  | 2  | 10 | 19 |    |
|       | n°4                                    | 8  | 5  | 1  | 2  | 4  | 5  | 13 | 22 |                     | 16 | 13 | 5  | 4  | 2  | 2  | 10 | 21 |    |
|       | mean                                   | 7  | 5  | 2  | 3  | 5  | 7  | 15 | 23 |                     | 15 | 12 | 5  | 4  | 2  | 2  | 9  | 18 |    |
| ±SD   | 1                                      | 1  | 1  | 1  | 1  | 2  | 2  | 1  |    | 1                   | 1  | 0  | 0  | 0  | 0  | 1  | 2  |    |    |
| B     | n°1                                    | 4  | 4  | 5  | 5  | 7  | 8  | 15 | 23 |                     | 18 | 15 | 6  | 5  | 2  | 2  | 12 | 23 |    |
|       | n°2                                    | 4  | 3  | 5  | 5  | 7  | 8  | 15 | 24 |                     | 14 | 12 | 5  | 4  | 2  | 2  | 8  | 17 |    |
|       | n°3                                    | 4  | 2  | 5  | 5  | 7  | 8  | 15 | 23 |                     | 18 | 14 | 6  | 5  | 2  | 2  | 10 | 21 |    |
|       | n°4                                    | 4  | 3  | 4  | 4  | 6  | 7  | 14 | 23 |                     | 16 | 13 | 5  | 4  | 1  | 1  | 10 | 20 |    |
|       | mean                                   | 4  | 3  | 5  | 4  | 7  | 8  | 15 | 23 |                     | 17 | 14 | 5  | 5  | 2  | 2  | 10 | 20 |    |
| ±SD   | 0                                      | 1  | 0  | 0  | 0  | 0  | 0  | 1  |    | 2                   | 1  | 1  | 1  | 0  | 0  | 1  | 2  |    |    |
| C     | n°1                                    | 6  | 5  | 2  | 2  | 4  | 4  | 11 | 18 | 26                  | 15 | 14 | 9  | 8  | 6  | 5  | 3  | 8  | 15 |
|       | n°2                                    | 8  | 6  | 2  | 2  | 3  | 4  | 11 | 19 | 28                  | 14 | 12 | 8  | 7  | 5  | 5  | 2  | 7  | 13 |
|       | n°3                                    | 6  | 5  | 2  | 2  | 3  | 4  | 10 | 18 | 26                  | 14 | 13 | 8  | 8  | 6  | 5  | 2  | 7  | 13 |
|       | n°4                                    | 6  | 4  | 1  | 1  | 3  | 3  | 10 | 16 | 24                  | 14 | 12 | 8  | 7  | 5  | 5  | 3  | 8  | 14 |
|       | mean                                   | 7  | 5  | 2  | 2  | 3  | 4  | 10 | 18 | 26                  | 14 | 13 | 8  | 8  | 6  | 5  | 2  | 7  | 14 |
| ±SD   | 1                                      | 1  | 0  | 0  | 0  | 0  | 1  | 1  | 2  | 1                   | 1  | 1  | 1  | 0  | 0  | 0  | 1  | 1  |    |
| D     | n°1                                    | 5  | 5  | 13 | 14 | 18 |    |    |    |                     | 23 | 17 | 6  | 8  | 17 |    |    |    |    |
|       | n°2                                    | 6  | 9  | 19 | 19 | 24 |    |    |    |                     | 26 | 19 | 9  | 11 | 22 |    |    |    |    |
|       | n°3                                    | 8  | 4  | 10 | 12 | 16 |    |    |    |                     | 22 | 16 | 4  | 5  | 11 |    |    |    |    |
|       | n°4                                    | 4  | 3  | 10 | 11 | 15 |    |    |    |                     | 21 | 16 | 5  | 7  | 14 |    |    |    |    |
|       | mean                                   | 6  | 5  | 13 | 14 | 19 |    |    |    |                     | 23 | 17 | 6  | 8  | 16 |    |    |    |    |
| ±SD   | 1                                      | 2  | 4  | 4  | 4  |    |    |    |    | 2                   | 1  | 2  | 2  | 4  |    |    |    |    |    |
