# Supplementary material for: Tibial revision knee arthroplasty with metaphyseal sleeves: The effect of stems on implant fixation and bone flexibility
Source: PubMed Central journal article supplement (PMC5421801; doi:10.1371/journal.pone.0177285), 2017-05-08
Supplement: pone.0177285.s002.pdf [file pone.0177285.s002.pdf]

**IMPLANT-BONE FLEXIBILITY**

| Group |             | Varus-valgus torque: Relative micromotions in $\mu\text{m}$ |                  |                  |                  |                  |                  |                  |                  |                  |                  |
|-------|-------------|-------------------------------------------------------------|------------------|------------------|------------------|------------------|------------------|------------------|------------------|------------------|------------------|
|       |             | Lateral load                                                |                  |                  |                  |                  | Medial load      |                  |                  |                  |                  |
|       |             | $\Delta_{b1,b2}$                                            | $\Delta_{b2,b3}$ | $\Delta_{b3,b4}$ | $\Delta_{b4,b5}$ | $\Delta_{b5,b6}$ | $\Delta_{b1,b2}$ | $\Delta_{b2,b3}$ | $\Delta_{b3,b4}$ | $\Delta_{b4,b5}$ | $\Delta_{b5,b6}$ |
| A     | n°1         | -2                                                          | -3               | -9               | -7               | -8               | -1               | 2                | 6                | 6                | 9                |
|       | n°2         | -3                                                          | -4               | -8               | -6               | -10              | 1                | 4                | 8                | 7                | 8                |
|       | n°3         | -2                                                          | -6               | -12              | -9               | -11              | 3                | 7                | 14               | 10               | 12               |
|       | n°4         | -6                                                          | -7               | -14              | -12              | -13              | 3                | 6                | 13               | 11               | 14               |
|       | <i>mean</i> | -3                                                          | -5               | -11              | -8               | -10              | 1                | 5                | 10               | 9*               | 11*              |
|       | $\pm SD$    | 2                                                           | 2                | 3                | 3                | 2                | 2                | 2                | 4                | 2                | 3                |
| B     | n°1         | -3                                                          | -9               | -16              | -12              | -13              | 2                | 8                | 15               | 12               | 13               |
|       | n°2         | -2                                                          | -6               | -11              | -8               | -11              | 2                | 7                | 8                | 9                | 12               |
|       | n°3         | -6                                                          | -8               | -15              | -11              | -13              | 3                | 8                | 15               | 10               | 16               |
|       | n°4         | -6                                                          | -5               | -10              | -6               | -8               | 4                | 5                | 9                | 7                | 8                |
|       | <i>mean</i> | -4                                                          | -7               | -13*             | -10              | -11              | 3                | 7                | 12*              | 9*               | 12*              |
|       | $\pm SD$    | 2                                                           | 2                | 3                | 3                | 3                | 1                | 1                | 4                | 2                | 3                |
| C     | n°1         | -2                                                          | -2               | -2               | -4               | -7               | 1                | 2                | 5                | 2                | 4                |
|       | n°2         | 0                                                           | -1               | -2               | -5               | -5               | 0                | 0                | 4                | 2                | 5                |
|       | n°3         | -4                                                          | -5               | -5               | -7               | -8               | 2                | 3                | 5                | 4                | 5                |
|       | n°4         | -2                                                          | -6               | -6               | -8               | -9               | 1                | 3                | 6                | 6                | 7                |
|       | <i>mean</i> | -2                                                          | -3*              | -4*              | -6               | -7               | 1*               | 2*               | 5                | 3                | 5                |
|       | $\pm SD$    | 2                                                           | 2                | 2                | 2                | 1                | 1                | 1                | 1                | 2                | 1                |
| D     | n°1         | -7                                                          | -4               | -6               | -2               | -5               | 4                | 4                | 3                | 2                | 2                |
|       | n°2         | -7                                                          | -7               | -4               | -4               | -4               | 5                | 2                | 6                | 3                | 6                |
|       | n°3         | -6                                                          | -5               | -5               | -4               | -6               | 3                | 5                | 4                | 3                | 6                |
|       | n°4         | -6                                                          | -6               | -7               | -6               | -6               | 5                | 6                | 6                | 5                | 7                |
|       | <i>mean</i> | -6                                                          | -6               | -6*              | -4*              | -5               | 4                | 4                | 5                | 3                | 5                |
|       | $\pm SD$    | 1                                                           | 1                | 1                | 2                | 1                | 1                | 1                | 2                | 1                | 2                |
| E     | n°1         | -5                                                          | -8               | -9               | -10              | -9               | 2                | 3                | 6                | 2                | 3                |
|       | n°2         | -6                                                          | -7               | -8               | -5               | -7               | 5                | 7                | 5                | 3                | 3                |
|       | n°3         | -5                                                          | -5               | -6               | -7               | -4               | 3                | 6                | 6                | 4                | 5                |
|       | n°4         | -3                                                          | -9               | -8               | -8               | -10              | 3                | 5                | 7                | 5                | 3                |
|       | <i>mean</i> | -4                                                          | -7               | -8               | -7               | -7               | 3                | 5                | 6                | 4                | 4                |
|       | $\pm SD$    | 1                                                           | 2                | 1                | 2                | 2                | 1                | 2                | 1                | 1                | 1                |
